# Supplementary material for: NADPH oxidase deficiency underlies dysfunction of aged CD8+ Tregs
Source: JCI journal article supplement (doi:10.1172/jci84181), 2016-04-17
Supplement: sd1 [file 1]

**Figure S1**

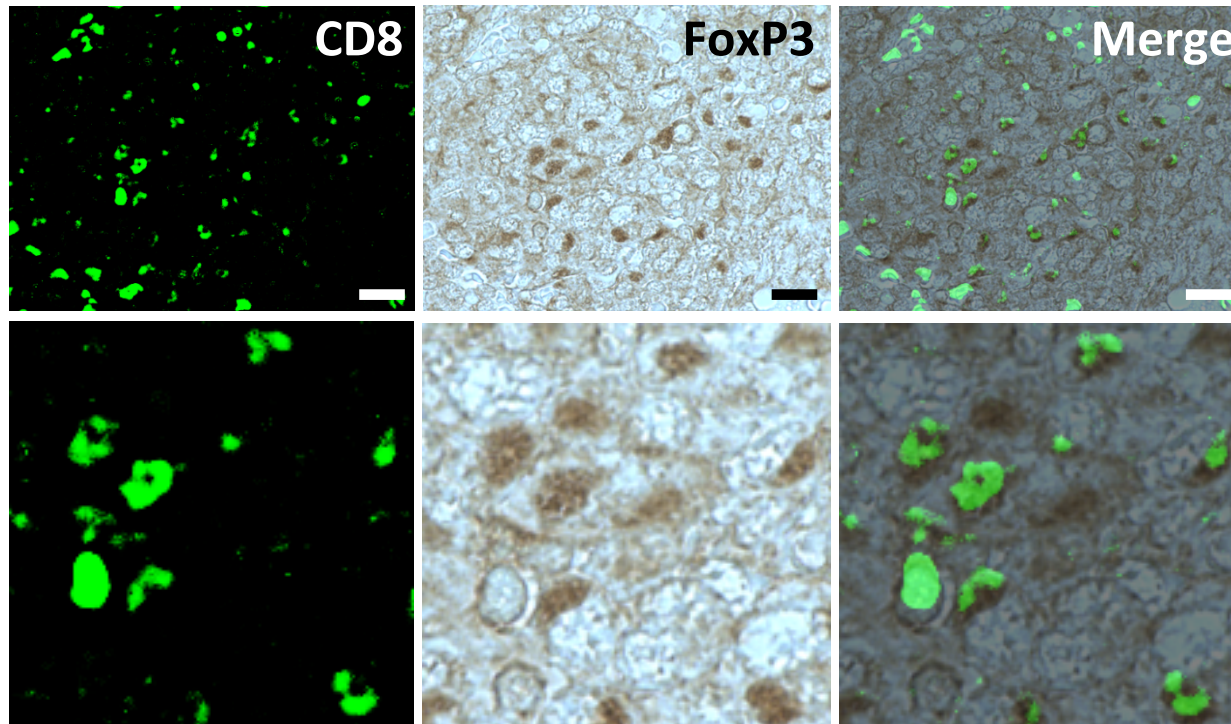

### **Localization of CD8 Tregs in human lymph nodes**

Frozen section from human lymph nodes were dual-stained with anti-CD8 (left panels) and anti-FoxP3 (middle panels). Bound anti-CD8 antibodies were visualized by immunofluorescence and anti-FoxP3 antibodies by immunohistochemistry. Merged images (right panels) demonstrate CD8<sup>+</sup>FoxP3<sup>+</sup> T cells within the T-cell rich zones. Images are representative for 5 different tissues. Scale bar 20  $\mu$ m.

**Figure S2**

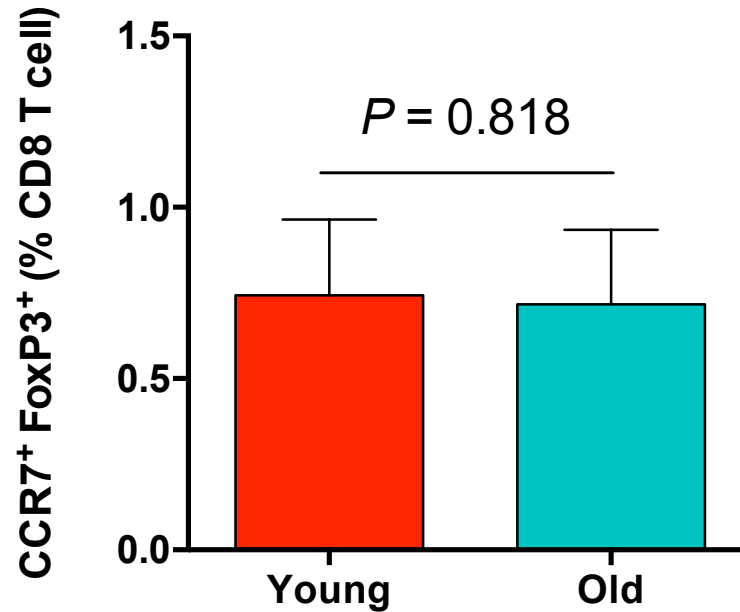

**Comparable frequencies of CD8<sup>+</sup>CCR7<sup>+</sup>FoxP3<sup>+</sup> T cells in young and old persons**

Frequency of CD8<sup>+</sup>CCR7<sup>+</sup>FoxP3<sup>+</sup> Tregs in peripheral blood of young and old donors were analyzed by flow cytometry. Results are shown as mean  $\pm$  SD from 7 independent experiments.

**Figure S3**

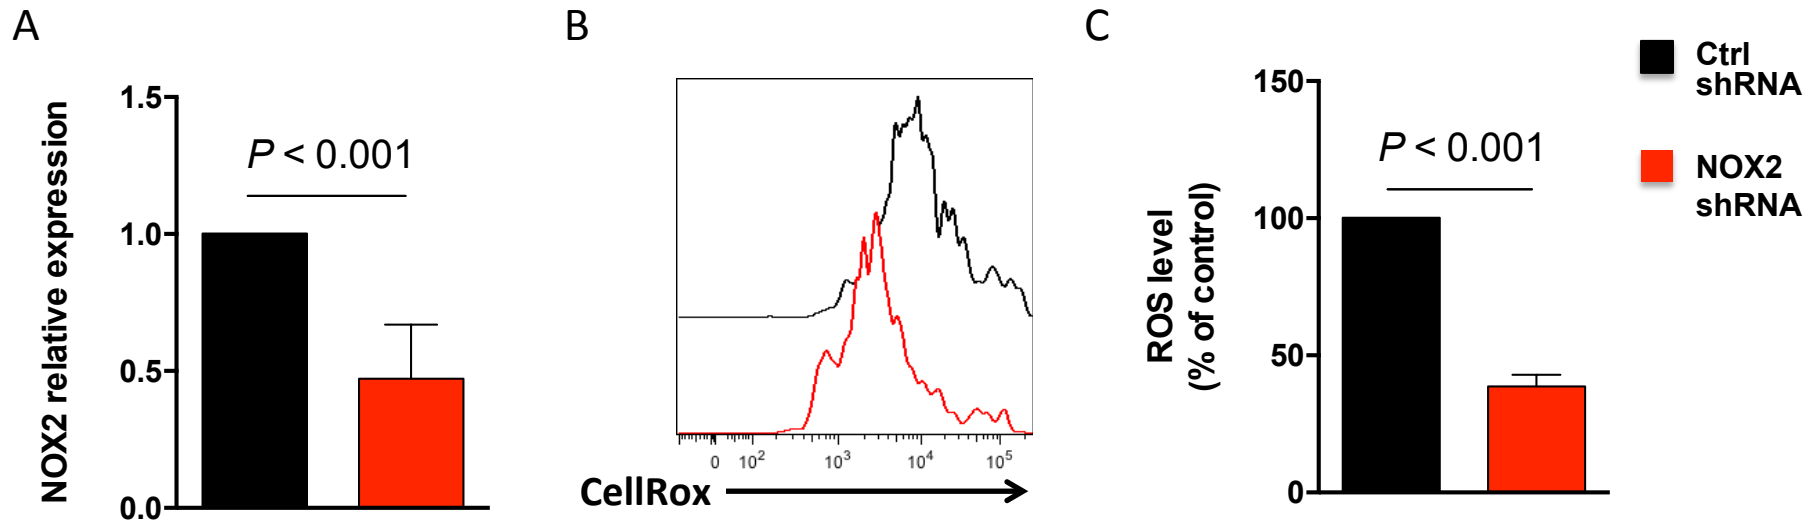

**Partial NOX2 knockdown results in partial reduction of ROS production**

(A) CD8 Tregs were transfected with NOX2 shRNA or control shRNA for 24h, and analyzed for NOX2 expression by qPCR. Mean  $\pm$  SD of relative NOX2 expression from 5 independent experiments.

(B, C) Transfected cells were loaded with the ROS-sensitive probe CellRox and intracellular ROS levels were measured by flow cytometry. Representative histograms and summary of 4 independent experiments (mean  $\pm$  SD) are shown.

**Figure S4**

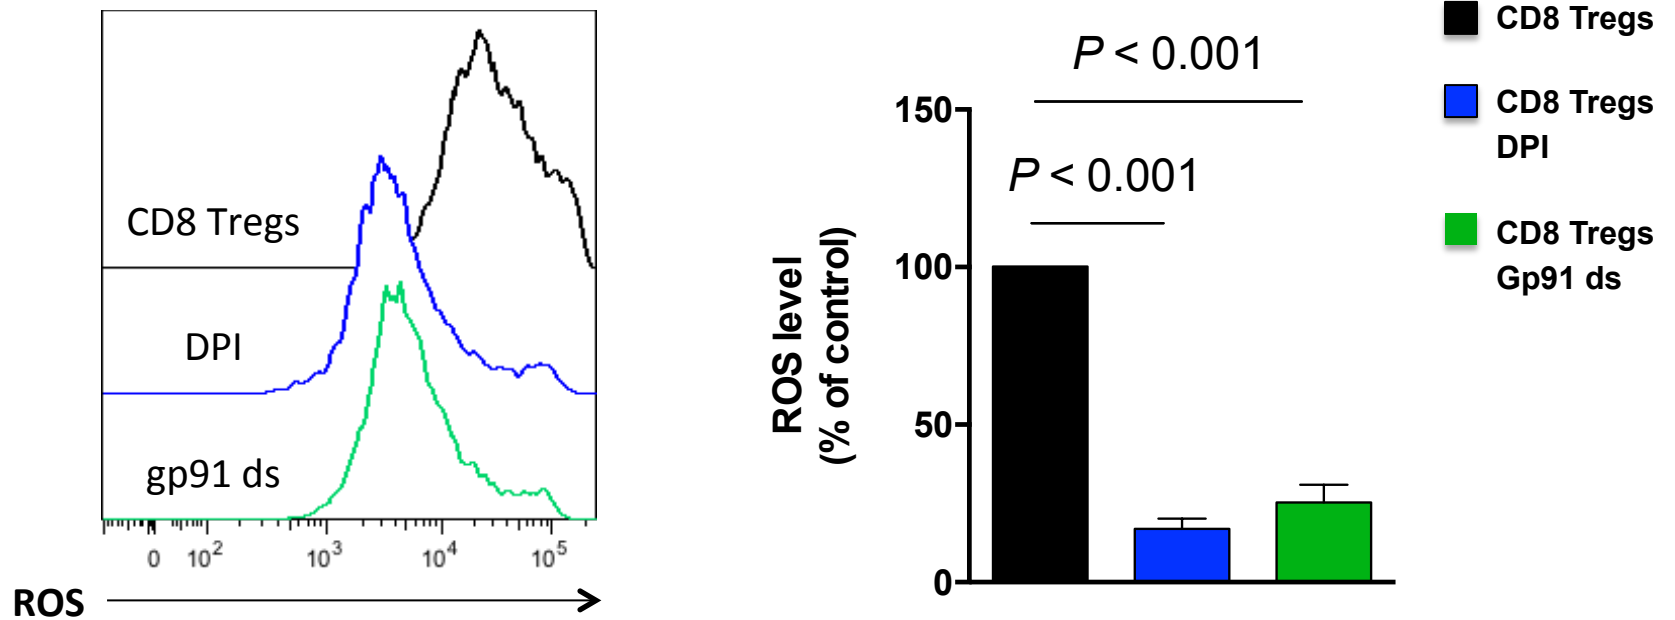

### ROS production in CD8 Tregs

CD8 Tregs were left untreated or pretreated for 20h with DPI or Gp91 ds-tat. Cells were loaded with CellROX to measure cellular ROS levels. Untreated CD8 Tregs served as controls.

Representative histograms and summary of 5 independent experiments (mean  $\pm$  SD) are shown.

**Figure S5**

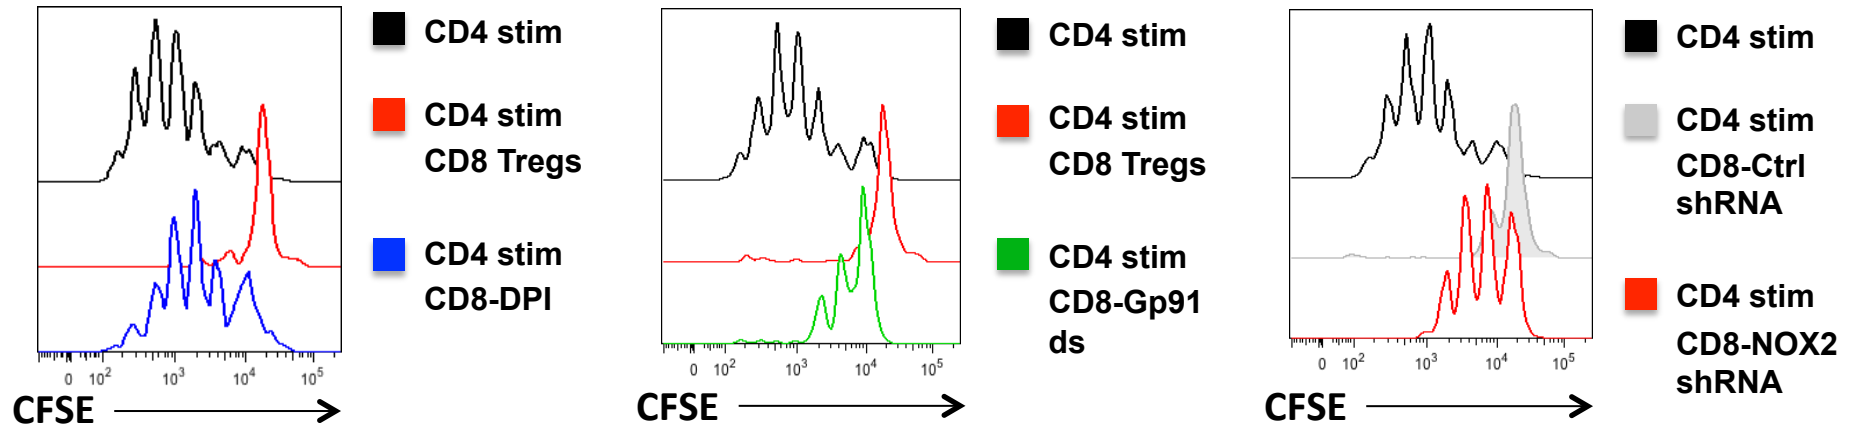

### **Interfering with NOX2 function abrogates the suppressive activity of CD8 Tregs**

CD8 Tregs were pretreated with DPI, Gp91 ds-tat or NOX2 knockdown, respectively, and subsequently tested for their suppressive function. CD4 T cells were labeled with CFSE, incubated with or without CD8 Tregs (1:1 ratio) and stimulated with anti-CD3/CD28 beads for 4 days. CD4 T cell proliferation was quantified by assessing CFSE dilution with flow cytometry. One representative dataset from 3 independent experiments is shown.

**Figure S6**

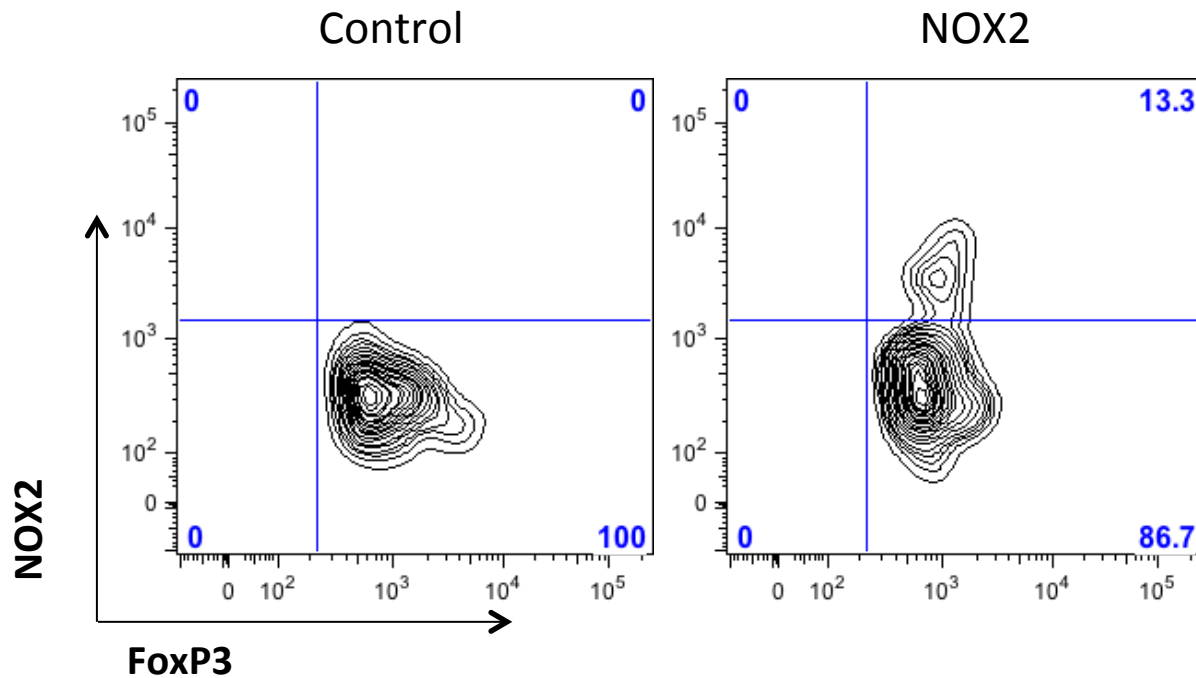

### Expression of NOX2 on CD4 Tregs in healthy individuals

Cellular expression of NOX2 was analyzed in gated CD4<sup>+</sup>FoxP3<sup>+</sup> T cells in the peripheral blood of healthy donors. FMO served as control. A representative result from one of 6 individuals is shown.

**Figure S7**

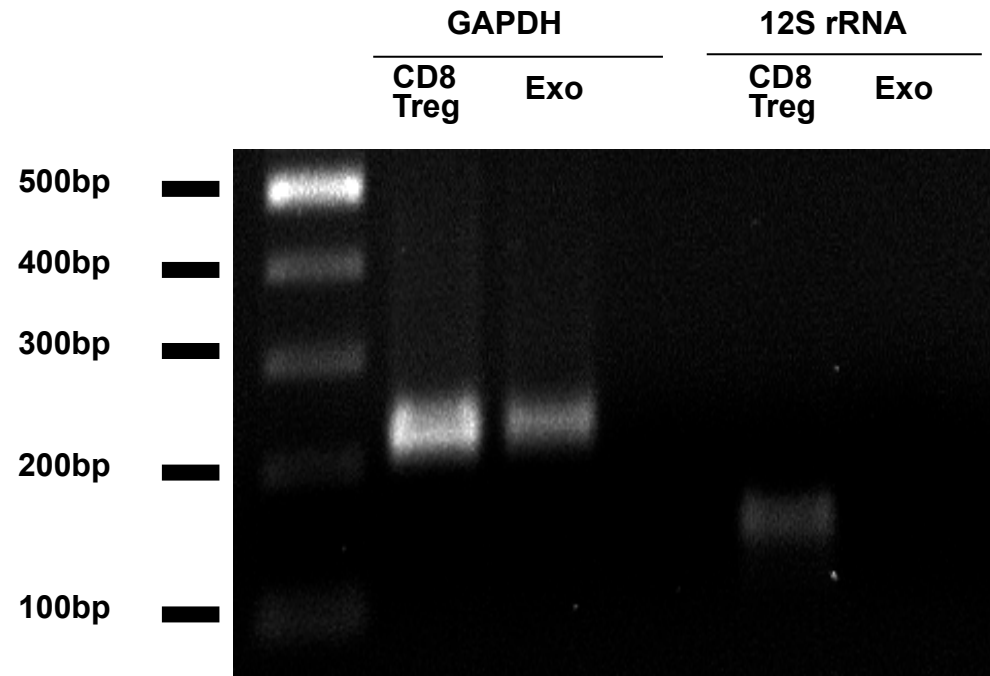

**Mitochondrial 12S rRNA is not expressed in CD8 Treg-derived exosomes.**

DNA was extracted from CD8 Tregs and from CD8-Treg-derived exosomes (Exo). GAPDH- and 12S rRNA-specific sequences were amplified by PCR and electrophoresed on an agarose gel.

**Figure S8**

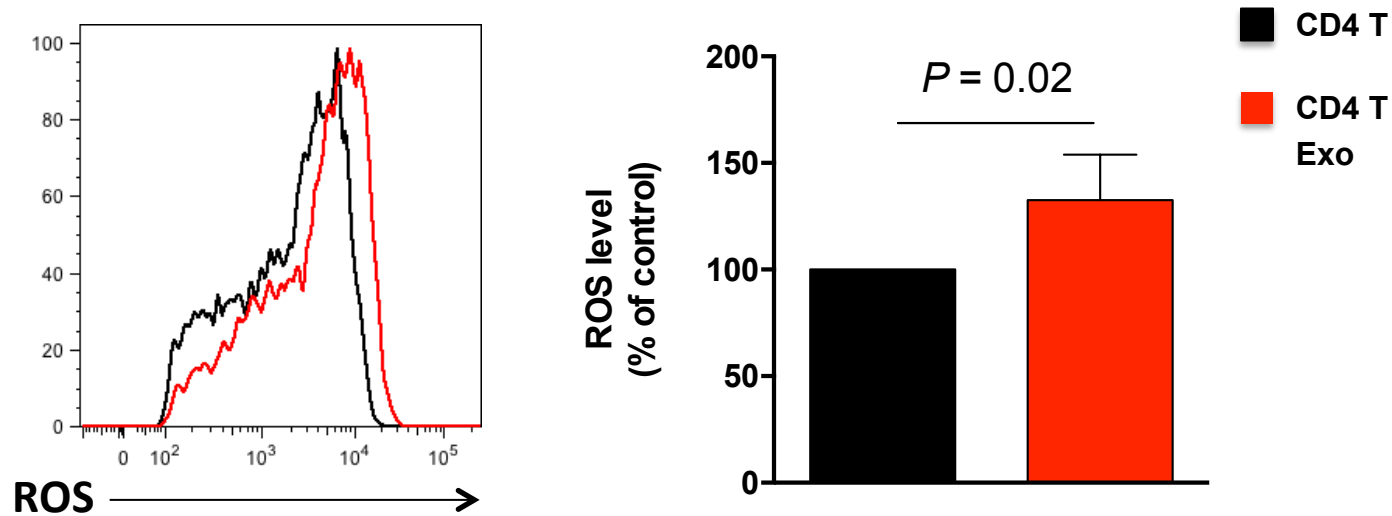

### **CD8 Treg-derived exosomes increase ROS levels in CD4 T cells**

CD4 T cells were incubated with CD8 Treg-derived exosomes (1:2500 ratio) for 60 min and then loaded with CellROX to detect ROS levels. Untreated CD4 T cells were used as controls.

Representative histograms and summary of 4 independent experiments (mean  $\pm$  SD) are shown.

**Figure S9**

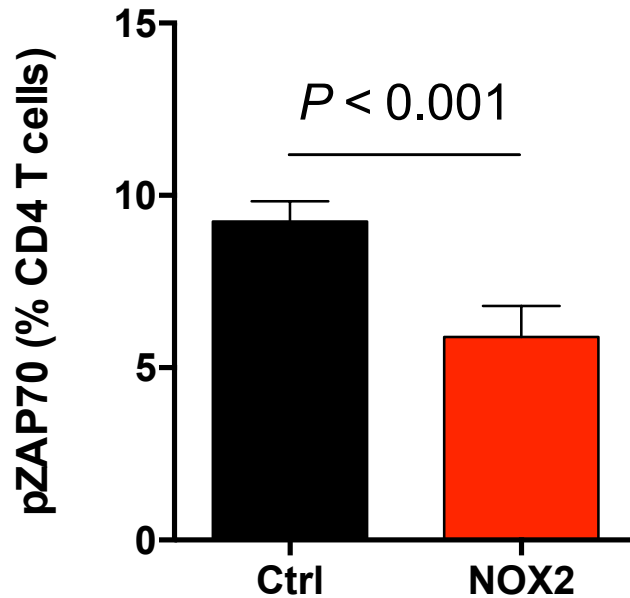

**Overexpression of NOX2 in CD4 T cells suppresses membrane-proximal signaling**

CD4 T cells were transfected with a control or NOX2 expression vector, stimulated with anti-CD3/CD28 beads (1:1) for 10min, and analyzed for ZAP70 phosphorylation. Results are shown as mean  $\pm$  SD from 5 independent experiments.
